# Supplementary material
Source: publisher figshare collection journal article supplement (https://acs.figshare.com/ndownloader/files/5761035)
Supplement: Supplementary file 1 [file 5761035]

Ms No. JA981869

## Supporting Information

Revised 9-2-98

### Materials and methods.

All reagents were used as supplied commercially unless otherwise noted. THF and diethyl ether were distilled from sodium under  $N_2$  before use.  $CH_2Cl_2$  was distilled under  $N_2$  from  $P_2O_5$ .  $CH_3CN$  was dried with  $P_2O_5$  and distilled from  $K_2CO_3$ . 2,2'-dimethoxy-1,1'-binaphthyl-3,3'-dicarboxylic acid was prepared according to literature method.<sup>†</sup>  $^1H$  NMR spectra were performed on a Varian XL-400 or XL-500 Spectrometer in the solvent specified, referenced to the residual proton signals. Routine mass spectra were obtained from the University of California, San Francisco Mass Spectrometry Facility. UV-visible spectra were recorded on a Hewlett-Packard 8452 Diode Array Spectrometer. Epoxide formation in olefin epoxidations was analyzed on a Hewlett-Packard 5890 Gas Chromatograph equipped with a DB-5 capillary column (0.32 mm  $\times$  25 M, i.d., 0.25  $\mu$ m, J&W Scientific). Enantiomeric excesses were determined by chiral GLC with a Cyclodex-B-PH chiral capillary column (0.26mm  $\times$  30 M, i.d., 0.25  $\mu$ m, J&W Scientific).

### General Procedure for Asymmetric Olefin Epoxidation.

Catalyst **1** (1  $\mu$ mol), dodecane (25  $\mu$ L, as a GC standard) and an olefin (1.0 mmol) were dissolved in freshly distilled  $CH_2Cl_2$  (2 mL) in a Shlenk tube. The mixture was deaerated by evacuation and refilling  $N_2$  for several times. With stirring and under a  $N_2$  flow,  $PhIO$  (0.10 mmol) was added in one portion. The reaction mixture was stirred at rt and monitored by GC periodically. Each aliquot (ca. 10  $\mu$ L) was passed through a short pad of silica gel (0.5 cm) and eluted with  $CH_2Cl_2$  (200  $\mu$ L). The elute was collected and injected on GC for analysis. At the end of the reaction,  $CH_2Cl_2$  was removed under reduced pressure and the reaction mixture was loaded on a short silica gel column (1  $\times$  5 cm).  $PhI$  and unreacted olefins were eluted with pentane. Epoxides were eluted with 20% ether/pentane. The ee's of the epoxides were determined by GC on a Cyclodex-B chiral stationary phase column. The GC conditions are as follows: (epoxide, oven temperature,

<sup>†</sup> Naruta, Y.; Tani, F.; Ishibara, N.; Maruyama, K. *J. Am. Chem. Soc.* **1991**, *113*, 6865.

retention time with the absolute configuration): (styrene oxide, 95°C, 14.3 min (R), 14.7 min (S); pentafluorostyrene oxide, 70°C, 32.3 min (R), 32.9 min (S); *m*-chlorostyrene oxide, 95°C, 44.2 min (R), 44.7 min (S); *o*-nitrostyrene oxide, 125°C, 41.4 min (R), 41.9 min (S); *m*-nitrostyrene oxide, 120°C, 107.7 min (R), 109.0 min (S); 1,2-dihydronaphthalene oxide, 95°C, 31.3 min (1S, 2R), 32.7 min (1R, 2S); *cis*- $\beta$ -methylstyrene oxide, 105°C, 13.6 min (1R, 2S), 14.1 min (1S, 2R); *t*-butyloxirane, 25°C, 15.6 min, 15.9 min; trimethylsilyloxirane, 35°C, 12.2 min, 12.6 min.

#### Preparation of (R)-binaphthyl di-CD<sub>3</sub> ether

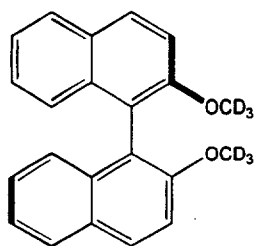

(R)-(+)-2,2'-Binaphthol (572 mg, 2.0 mmol) and CD<sub>3</sub>I (870 mg, 6.0 mmol) were dissolved in anhydrous MeCN (20 mL, dried and distilled from K<sub>2</sub>CO<sub>3</sub>). To the solution was added in one portion dry Cs<sub>2</sub>CO<sub>3</sub> (1.96 g, 6.0 mmol). The mixture was stirred at room temperature under an atmosphere of N<sub>2</sub> for 24h. Ether (100 mL) was added and the mixture was washed with saturated NaCl solution (20 mL  $\times$  3). The ether layer was separated and dried over MgSO<sub>4</sub>. After evaporation of the solvent, the crude product was purified by passing through a short silica gel column (eluent: CH<sub>2</sub>Cl<sub>2</sub>/hexane = 1/1). Yield 627 mg (98%).

<sup>1</sup>H NMR (400 MHz/CDCl<sub>3</sub>) 7.97(d, J = 8.9 Hz, 2H), 7.86(d, J = 8.1 Hz, 2H), 7.45(d, J = 8.9 Hz, 2H), 7.31(dd, J = 8.1, 7.0 Hz, 2H), 7.20(dd, J = 8.3, 7.0 Hz, 2H), 7.10(d, J = 8.3 Hz, 2H).

<sup>13</sup>C NMR (400 MHz/CDCl<sub>3</sub>) 154.93, 133.97, 129.38, 129.16, 127.91, 126.30, 125.22, 123.49, 119.52, 114.18.

MS: m/e = 323.2 (M+H)<sup>+</sup> for C<sub>22</sub>H<sub>12</sub>D<sub>6</sub>O<sub>2</sub> (LSIMS<sup>+</sup>).

#### Preparation of CD<sub>3</sub>O-substituted binaphthyl diacid

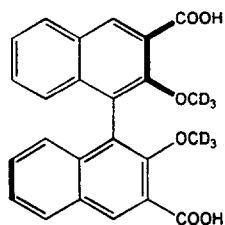

A 200 mL three-necked flask was fitted with a reflux condenser, a N<sub>2</sub> inlet and gas outlet (on top of the condenser) connected to a bubbler. The system was flushed with dry N<sub>2</sub> and the walls of the glassware were dried with a small flame. Under a N<sub>2</sub> flow, the flask was charged with di-CD<sub>3</sub> ether (500 mg, 1.56 mmol), TMEDA (N, N, N', N'-tetramethylethylenediamine, 1.0 mL) and diethyl ether freshly distilled from sodium (100 mL). The mixture was cooled to 0°C by an ice-water bath. With stirring, n-BuLi (2.5M in hexane, 2.5 mL, ca. 6.2 mmol) was slowly added via a syringe. After the addition was complete, the mixture was warmed to room temperature and refluxed for 24h. This mixture was cooled to 0°C again and CO<sub>2</sub> (dried by passing through concentrated H<sub>2</sub>SO<sub>4</sub>) was bubbled through the solution for 1h. After stirring for another hour, ether was removed by rotary evaporation, water (100 mL) was added and the resulting mixture was washed with benzene (30 mL × 2) (The benzene layer may contain unreacted starting material if the metalation is not complete). The aqueous layer was then acidified with 5M HCl solution and extracted with CHCl<sub>3</sub> (50 mL × 3). The CHCl<sub>3</sub> extractions were combined and dried with Na<sub>2</sub>SO<sub>4</sub>. Removal of the solvent gave the crude product which was recrystallized from hot benzene. Yield 414 mg (65%).

<sup>1</sup>H NMR (400 MHz/CDCl<sub>3</sub>) 8.95(s, 2H), 8.07(d, J = 7.5 Hz, 2H), 7.54(t, J = 7.5 Hz, 2H), 7.45(t, J = 7.5 Hz, 2H), 7.15(d, J = 7.5 Hz, 2H).

<sup>13</sup>C NMR (400 MHz/CDCl<sub>3</sub>) 166.52, 153.89, 143.80, 136.38, 136.14, 130.04, 129.95, 126.57, 125.31, 124.42, 121.36.

MS (m/e): 409.1 (M+H)<sup>+</sup> for C<sub>24</sub>H<sub>12</sub>D<sub>6</sub>O<sub>6</sub> (LSIMS<sup>+</sup>).

### Preparation of ααββ bis-binaphthyl-strapped free base porphyrin

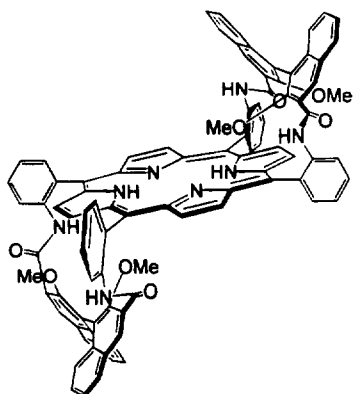

Binaphthyl diacid chloride was freshly prepared by refluxing 2,2'-dimethoxy-1,1'-binaphthyl-3,3'-dicarboxylic acid (45 mg, 0.11 mmol) with  $\text{SOCl}_2$  for 8h and dried *in vacuo*.  $\alpha\alpha\beta\beta$ -TAPP (tetrakis(*o*-aminophenyl)porphine) (34 mg, 0.05 mmol) and *N,N*-diethylaniline (45 mg, 0.30 mmol) were dissolved in anhydrous THF (25 mL, freshly distilled from sodium). Under a flow of dry  $\text{N}_2$ , the solution was cooled to  $0^\circ\text{C}$  with an ice-water bath and a solution of the diacid chloride in THF (10 mL) was added by syringe pump over 1h. The mixture was allowed to stir at room temperature overnight. THF was removed by rotary evaporation and the residue was taken up in  $\text{CH}_2\text{Cl}_2$  (100 mL) and washed with water (20 mL). After dried with  $\text{Na}_2\text{SO}_4$ , the solution was reduced to dryness and the residue was subject to column chromatography on silica gel (eluent:  $\text{CH}_3\text{OH}/\text{CH}_2\text{Cl}_2 = 1/99$ ) to give bis-binaphthyl-strapped porphyrin (42 mg, 60%).

$^1\text{H}$  NMR (400 MHz/ $\text{CDCl}_3$ ) 11.85(s, 2H), 9.11(d,  $J = 8.0$  Hz, 2H), 8.86-8.85(m, 6H), 8.69(s, 4H), 8.40(d,  $J = 8.0$  Hz, 2H), 8.33(d,  $J = 6.7$  Hz, 2H), 7.99(s, 2H), 7.95-7.85(m, 4H), 7.82(t,  $J = 6.7$  Hz, 2H), 7.69(t,  $J = 6.7$  Hz, 2H), 7.64(s, 2H), 7.34-7.20(m, 8H), 7.06(t,  $J = 6.6$  Hz, 2H), 6.93(t,  $J = 6.6$  Hz, 2H), 6.74(t,  $J = 6.7$  Hz, 2H), 6.51(d,  $J = 6.6$  Hz, 2H), 6.37(d,  $J = 6.7$  Hz, 2H), 2.96(s, 6H), -0.65(s, 6H), -2.93(s, 2H).

MS:  $m/e = 1407.5$  ( $\text{M}+\text{H}$ ) $^+$  for  $\text{C}_{92}\text{H}_{62}\text{N}_8\text{O}_8$  (LSIMS $^+$ ).

UV-vis ( $\text{CH}_2\text{Cl}_2$ ): 418(soret), 510 nm.

#### Preparation of $\text{Fe}(\alpha\alpha\beta\beta\text{-TAPP})\text{Cl}$

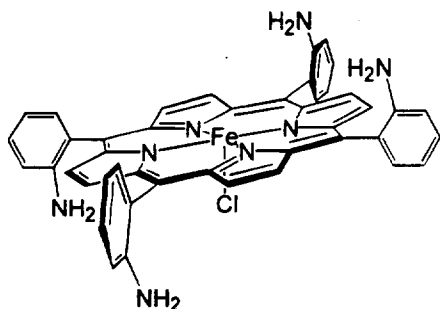

A mixture  $\alpha\alpha\beta\beta$ -TAPP (67.4 mg, 0.10 mmol),  $\text{FeBr}_2$  (200 mg, 0.93 mmol), 2,6-lutidine (0.20 mL) in benzene-THF solution (1:1, 50 mL) was stirred for 24h at room temperature in a dry box. The metalation was complete as indicated by UV-visible spectroscopy. This mixture was brought out and stirred under air for 3h. The solvents were removed under vacuum and the residue was dissolved in  $\text{CH}_2\text{Cl}_2$  (200 mL) and filtered to remove iron salt. The  $\text{CH}_2\text{Cl}_2$  layer was washed with aqueous  $\text{NH}_4\text{Cl}$  solution, dried over  $\text{MgSO}_4$  and concentrated to give  $\text{Fe}(\alpha\alpha\beta\beta\text{-TAPP})\text{Cl}$ . The yield is quantitative.

MS:  $m/e = 728.2 \text{ (M-Cl)}^+$  for  $\text{C}_{44}\text{H}_{32}\text{ClFeN}_8$  (LSIMS<sup>+</sup>).

UV-vis ( $\text{CH}_2\text{Cl}_2$ ): 370, 416, 510, 580 nm.

#### Preparation of $\alpha\alpha\beta\beta$ bis-binaphthyl-strapped Fe porphyrin (1)

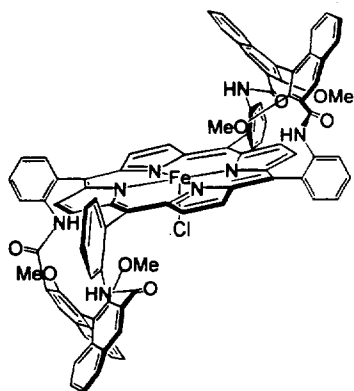

Binaphthyl diacid chloride was freshly prepared by refluxing the diacid (45 mg, 0.11 mmol) with  $\text{SOCl}_2$  for 8h and dried *in vacuo*.  $\text{Fe}(\alpha\alpha\beta\beta\text{-TAPP})\text{Cl}$  (35 mg, 0.05 mmol) and N, N-diethylaniline (45 mg, 0.30 mmol) were dissolved in anhydrous THF (25 mL, freshly distilled from sodium). Under a flow of dry  $\text{N}_2$ , the solution was cooled to  $0^\circ\text{C}$  with an ice-water bath and a solution of the diacid chloride in THF (10 mL) was added by syringe pump over 1h. The mixture was allowed to stir at room temperature overnight.

THF was removed by rotary evaporation and the residue was taken up in  $\text{CH}_2\text{Cl}_2$  (100 mL) and washed with water (20 mL). After dried with  $\text{Na}_2\text{SO}_4$ , the solution was reduced to dryness and the residue was subject to column chromatography on silica gel (eluent:  $\text{CH}_3\text{OH}/\text{CH}_2\text{Cl}_2 = 5/95$ ). The fraction was washed with 10% aqueous HCl and dried to give bis-binaphthyl-strapped Fe porphyrin **1** (40 mg, 53%).

MS  $m/e = 1461.4$  (M-Cl)<sup>+</sup> for  $\text{C}_{92}\text{H}_{60}\text{ClFeN}_8\text{O}_8$  (LSIMS<sup>+</sup>).

UV-vis ( $\text{CH}_2\text{Cl}_2$ ): 346, 420, 504, 566 nm.

Catalyst **1a** was synthesized following the same procedure using  $\text{CD}_3\text{O}$ -substituted binaphthyl diacid.

MS  $m/e = 1473.4$  (M-Cl)<sup>+</sup> for  $\text{C}_{92}\text{H}_{48}\text{ClD}_{12}\text{FeN}_8\text{O}_8$  (LSIMS<sup>+</sup>).

UV-vis ( $\text{CH}_2\text{Cl}_2$ ): 345, 420, 504, 564 nm.

**Demetalation of 1.** A mixture of **1** (10 mg) and  $\text{NaBH}_4$  (38 mg) in  $\text{CH}_3\text{OH}$  (5 mL) was stirred at rt under  $\text{N}_2$  for 1h. To the mixture was added deaerated HCl solution (6 N, 2 mL) with cooling. The demetalated porphyrin was taken up with  $\text{CH}_2\text{Cl}_2$  (10 mL), washed with water (5 mL  $\times$  2) and dried with  $\text{Na}_2\text{SO}_4$ . Evaporation of the solvents gave the corresponding metal free porphyrin. The  $^1\text{H}$  NMR and mass spectra are identical with the porphrin prepared from  $\alpha\alpha\beta\beta$ -TAPP and **4**.

**Experiment procedure for determining the ee's at different turnover numbers.**

Catalyst **1** or **1a** (1  $\mu\text{mol}$ ), dodecane (25  $\mu\text{L}$ , as a GC standard) and styrene (2.0 mL, ca. 17.5 mmol) and  $\text{CH}_2\text{Cl}_2$  (2 mL) were mixed in a Shlenk tube. The mixture was deaerated by evacuation and refilling  $\text{N}_2$  several times. With stirring and under a  $\text{N}_2$  flow, PhIO was added in 10  $\mu\text{mol}$ , 10  $\mu\text{mol}$ , 100  $\mu\text{mol}$ , 200  $\mu\text{mol}$ , 400  $\mu\text{mol}$ , 1000  $\mu\text{mol}$ , 2000  $\mu\text{mol}$ , 2000  $\mu\text{mol}$  portions over time intervals during which the previous batch of oxidant was mostly consumed as indicated by the disappearance of solid PhIO. Small aliquots of the reaction mixture were taken periodically and subject to GC analysis as described in **General Procedure**. Ee's were plotted against the corresponding turnover numbers.

**Styrene epoxidation catalyzed by 1 with different axial ligands.**

Catalyst 1 (1  $\mu\text{mol}$ ), dodecane (25  $\mu\text{L}$ , as a GC standard), styrene (1.0 mmol) and an ligand (30  $\mu\text{mol}$ ) were dissolved in freshly distilled  $\text{CH}_2\text{Cl}_2$  (2 mL) in a Shlenk tube. When weak field ligands such as DMSO and 2,6-difluoropyridine are used,  $\text{AgBF}_4$  (5  $\mu\text{mol}$ ) was added and the mixture was stirred for 1h to remove choride ligand from the iron (aluminum foil was applied to protect the tube from light). The mixture was deaerated by evacuation and refilling  $\text{N}_2$  several times. With stirring and under a  $\text{N}_2$  flow, PhIO (0.10 mmol) was added. The reaction mixture was stirred at rt. The epoxidation products were analyzed by GC as described in **General Procedure**.

**Epoxidation Reaction Using Olefin as the Limiting Reagent.**

Catalyst 1 (1  $\mu\text{mol}$ ) and an olefin (1.0 mmol) were dissolved in  $\text{CH}_2\text{Cl}_2$  (2 mL) in a Shlenk tube. PhIO (264 mg, 1.2 mmol) was added to the solution in 10 portions at room temperature with stirring. Each subsequent portion was added when the previous batch of PhIO had been consumed as indicated by the disappearance of the solid oxidant. The reaction was monitored with GC until the substrate was completely consumed. The reaction mixture was concentrated and the residue was subject to column chromatography on silica gel to give the epoxide. The ee of the product was determined by GC as described in **General Procedure**.

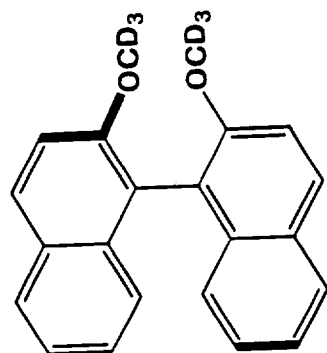

<sup>1</sup>H NMR (400 MHz/CDCl<sub>3</sub>)

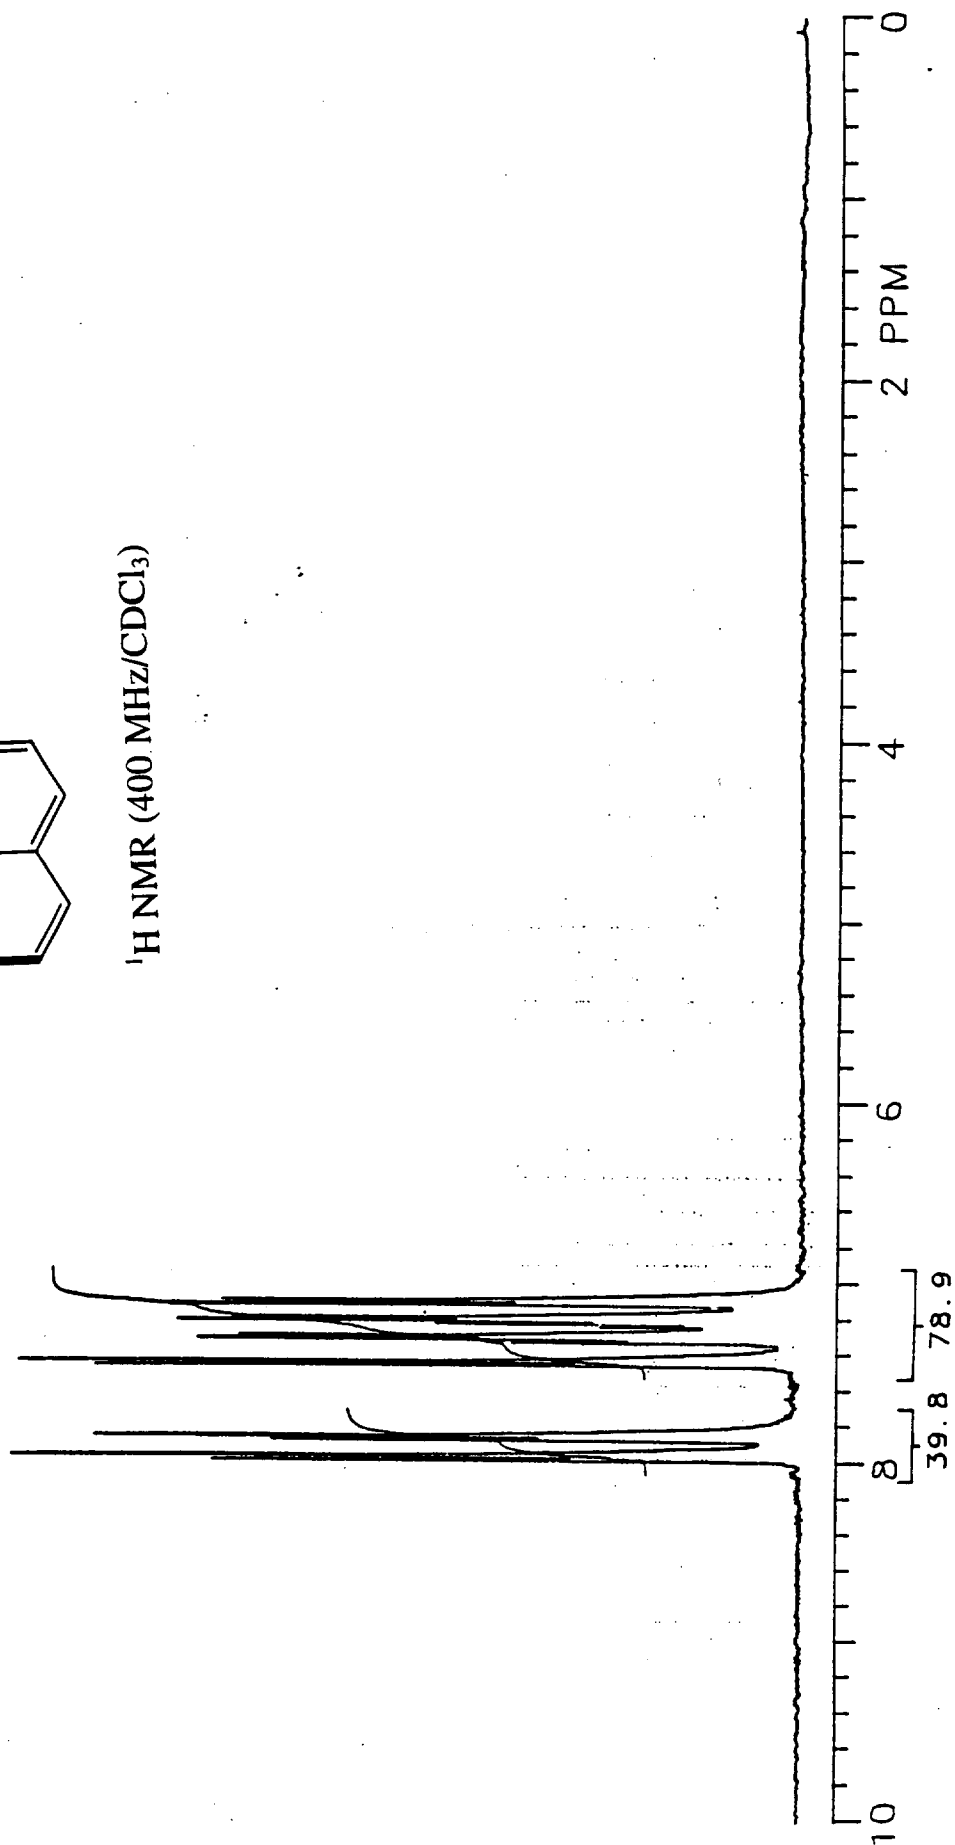



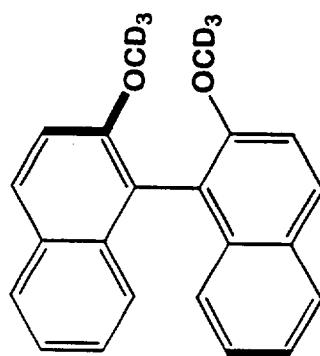

$^{13}\text{C}$  NMR (400 MHz/ $\text{CDCl}_3$ )

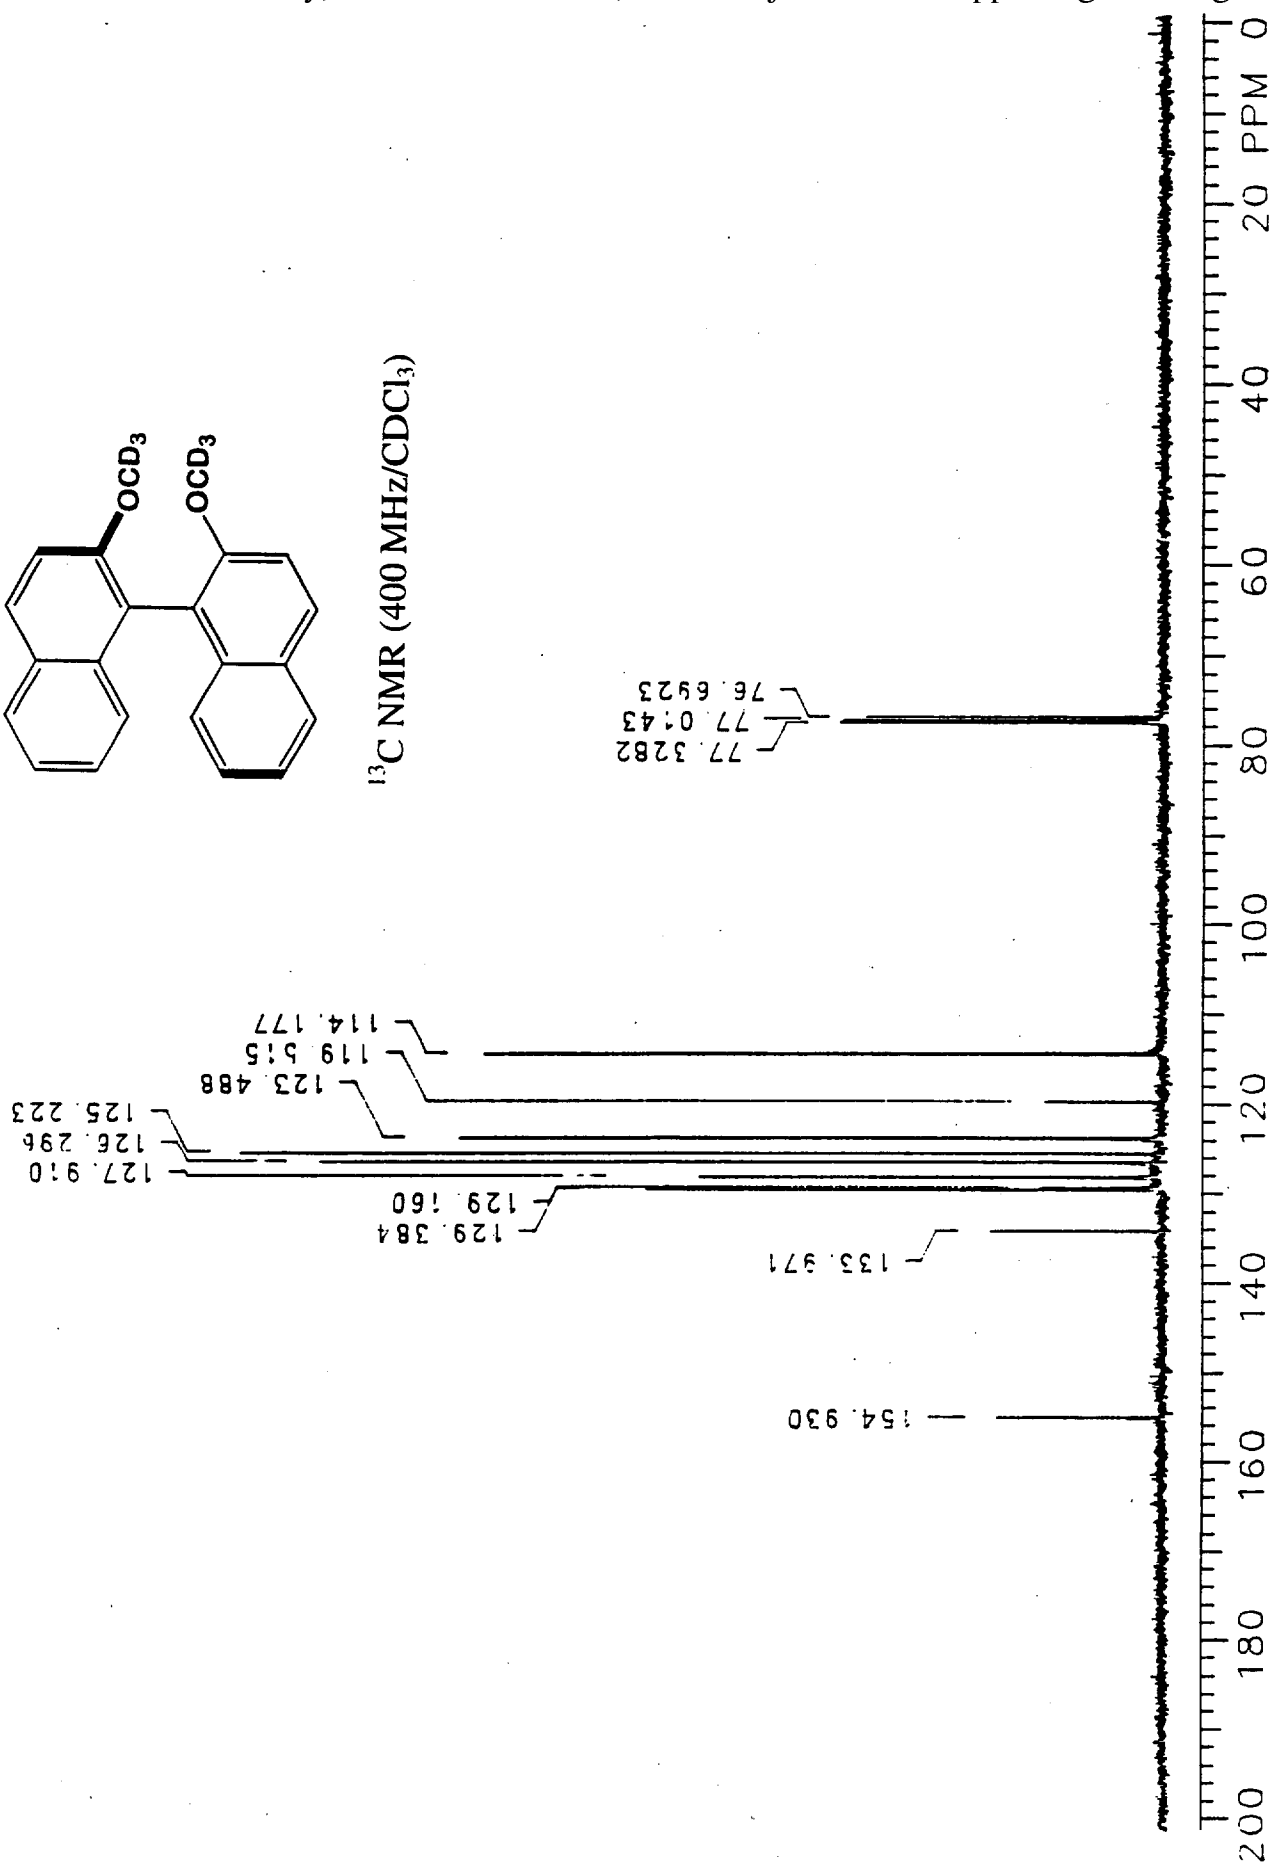

EXP1 PULSE SEQUENCE: STD1H  
DATE 07-19-96  
SOLVENT CDCL3  
FILE CDCL3

OBSERVE PROTON  
FREQUENCY 399.95 MHz  
SPECTRAL WIDTH 5000.0 HZ  
ACQ. TIME 1.997 SEC  
RELAXATION DELAY 1.0 MSEC  
PULSE WIDTH 41 DEGREES  
AMBIENT TEMPERATURE  
NO. REPETITIONS 16  
DOUBLE PRECISION ACQUISITION  
DATA PROCESSING  
LINE BROADENING 0.2 HZ  
FT SIZE 32K

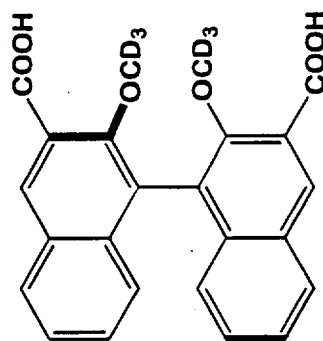

<sup>1</sup>H NMR (400 MHz/CDCl<sub>3</sub>)

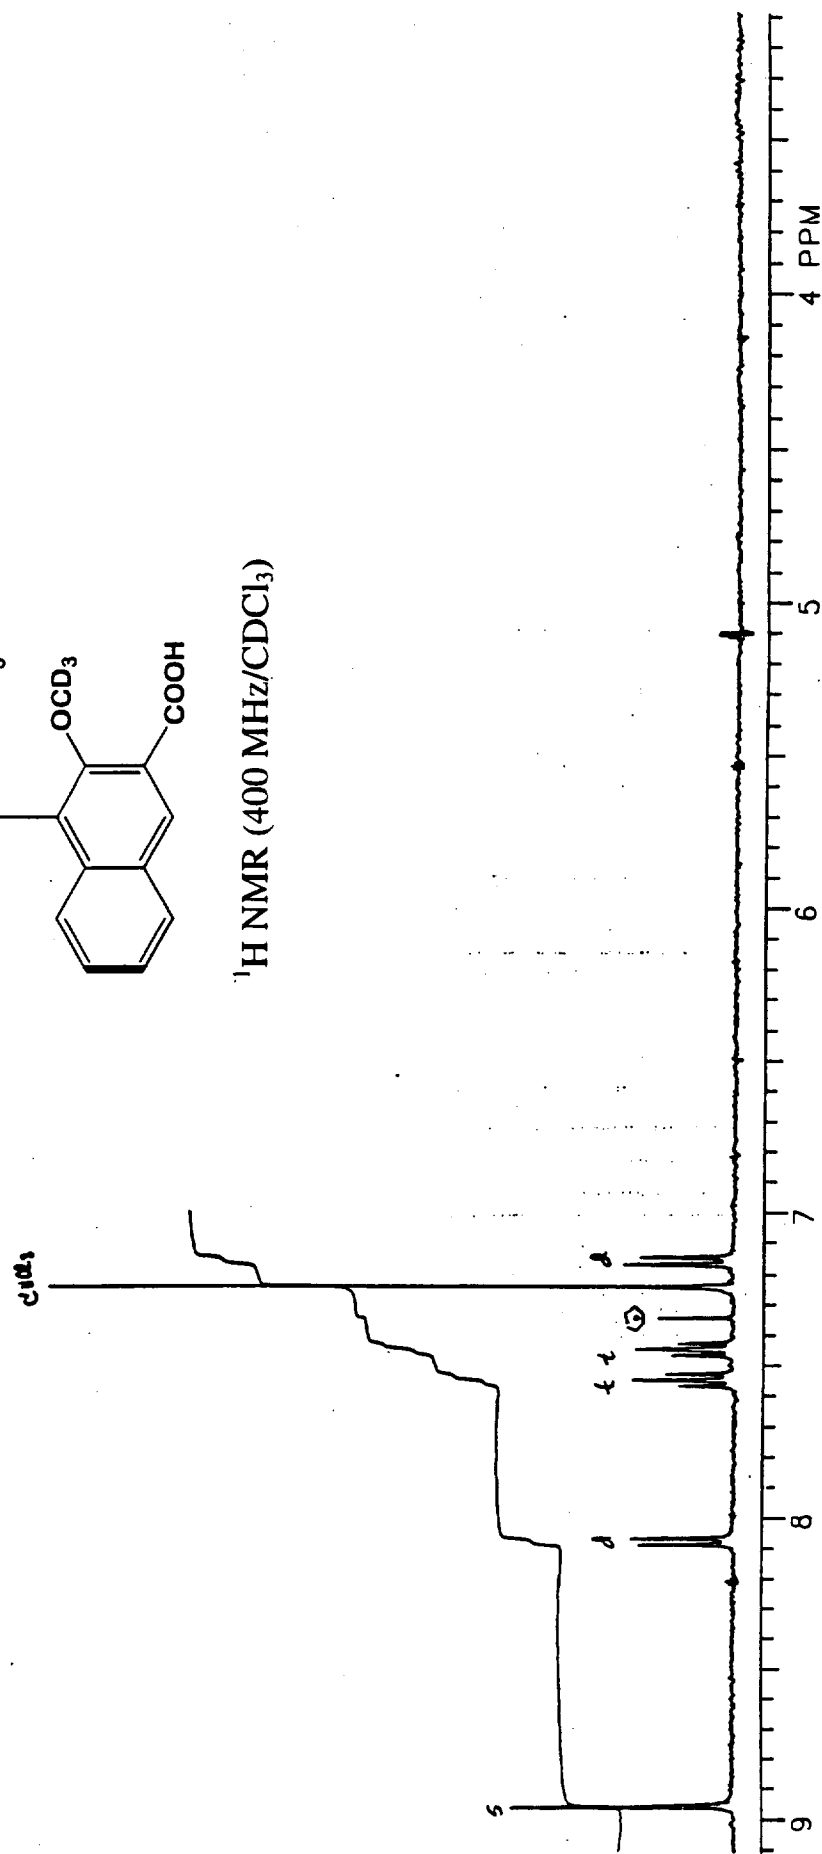

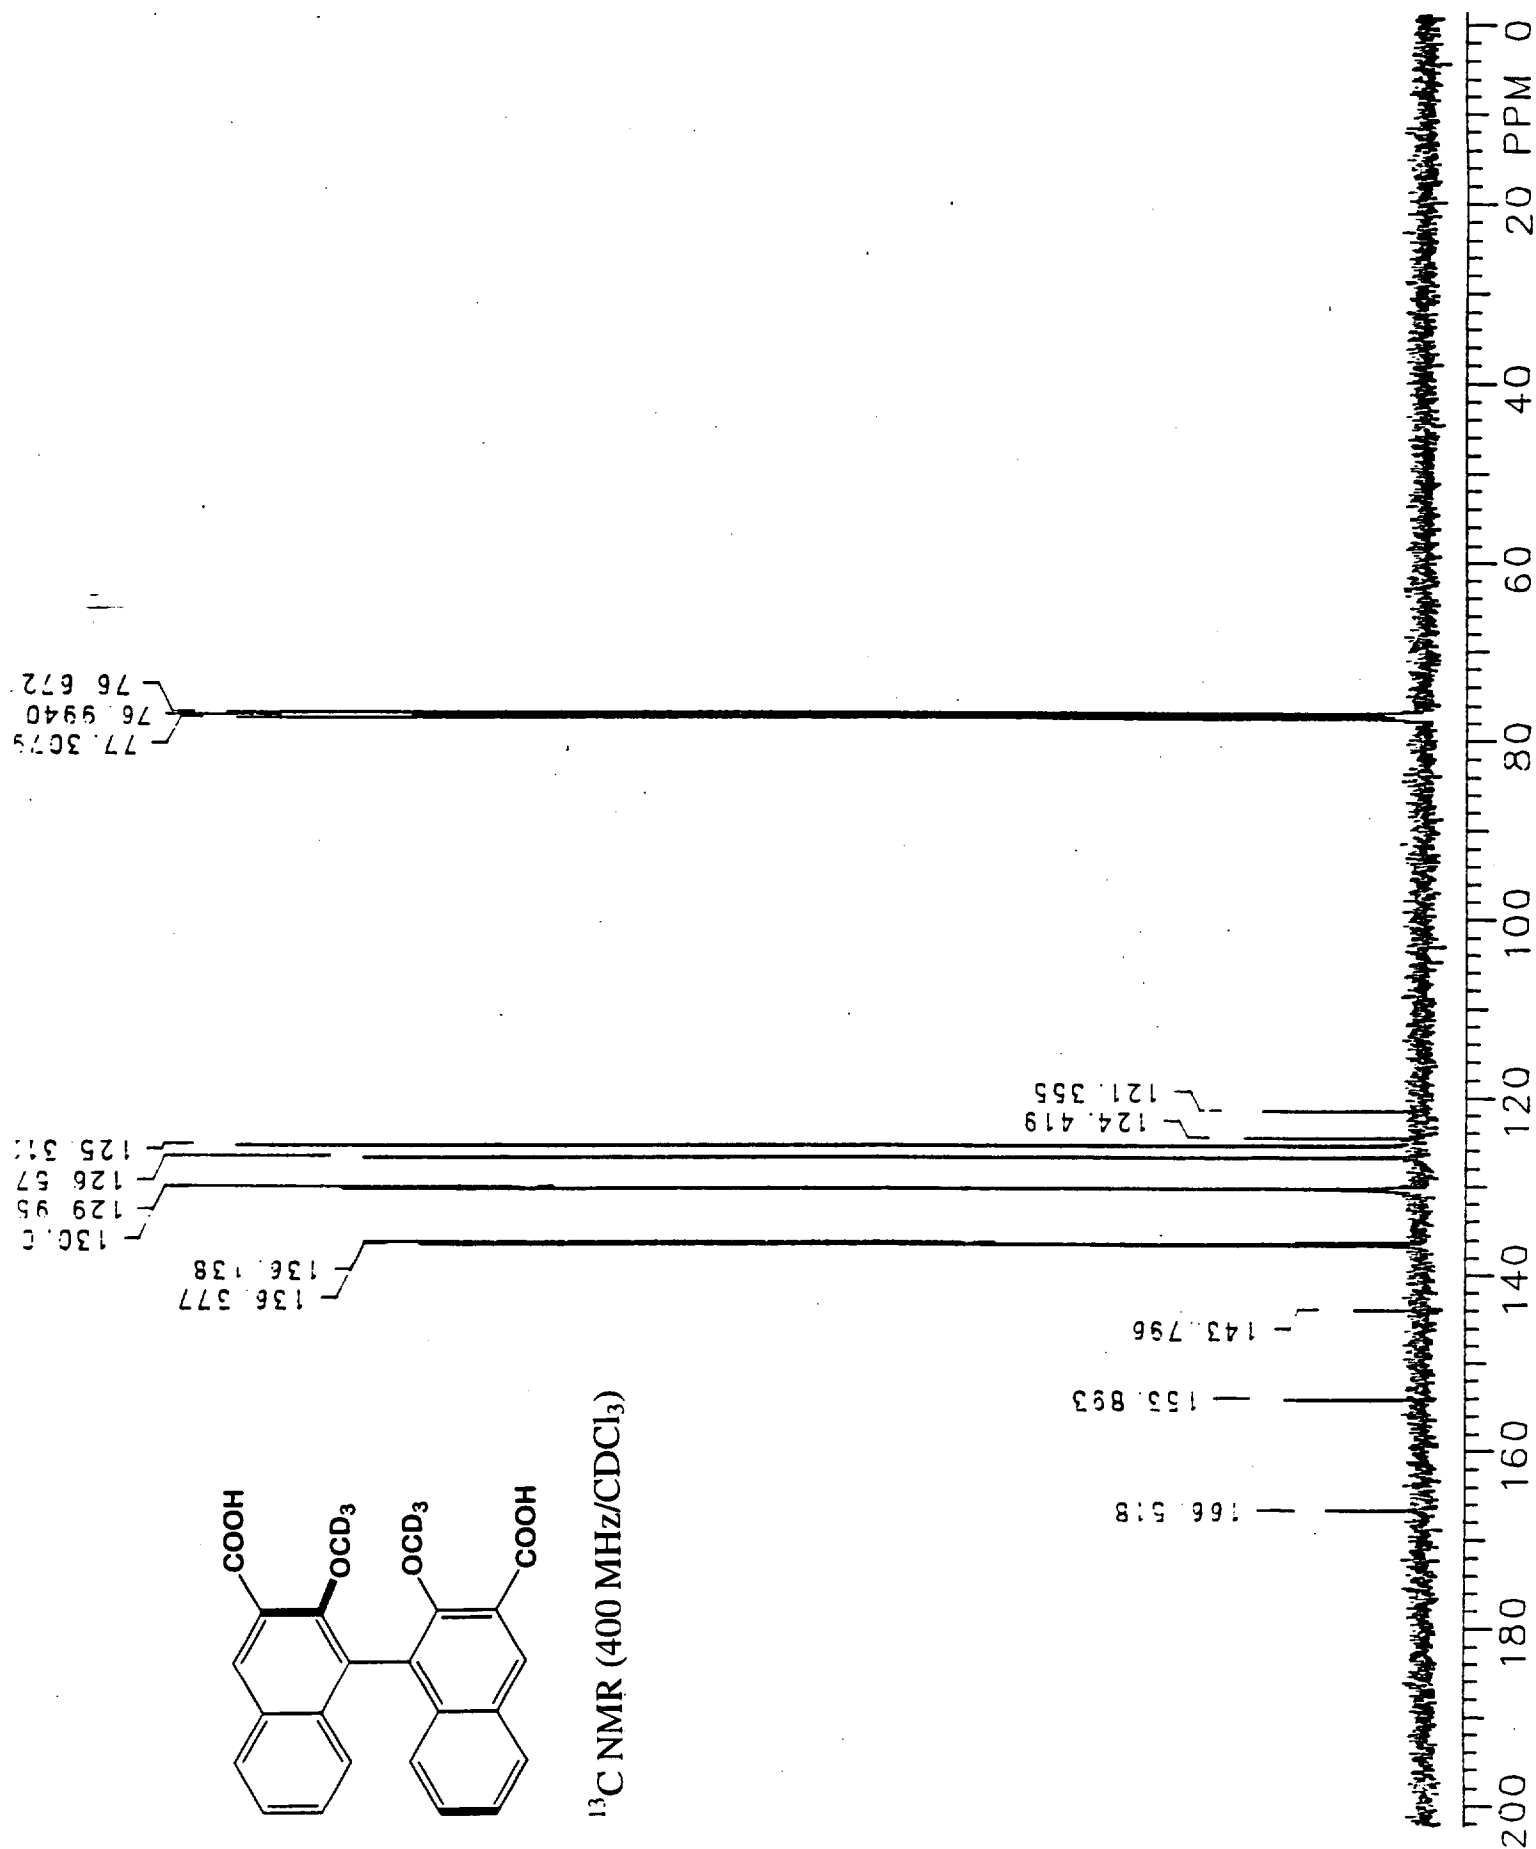

aabb TAPP + binap dladid c1, frac 1

Solvent: CDCl<sub>3</sub>  
Ambient temperature  
INNOVA-500 "01500"

PULSE SEQUENCE

Pulse 45.0 degrees  
Acq. time 1.998 sec  
Width 8999.9 Hz

10000 repetitions

OBSERVE H1, 499.7485831 MHz

DATA PROCESSING

Line broadening 0.2 Hz

FT size 65536

Total time 5.6 hours

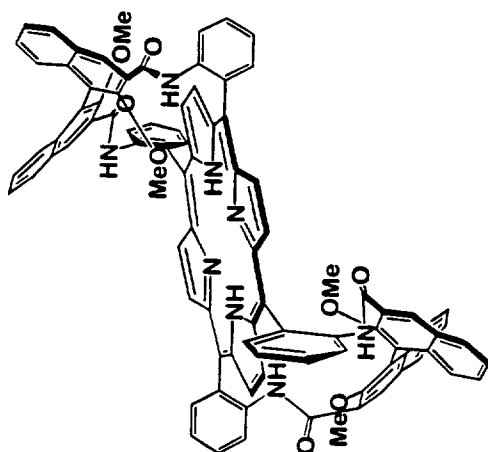

<sup>1</sup>H NMR (500 MHz/CDCl<sub>3</sub>)

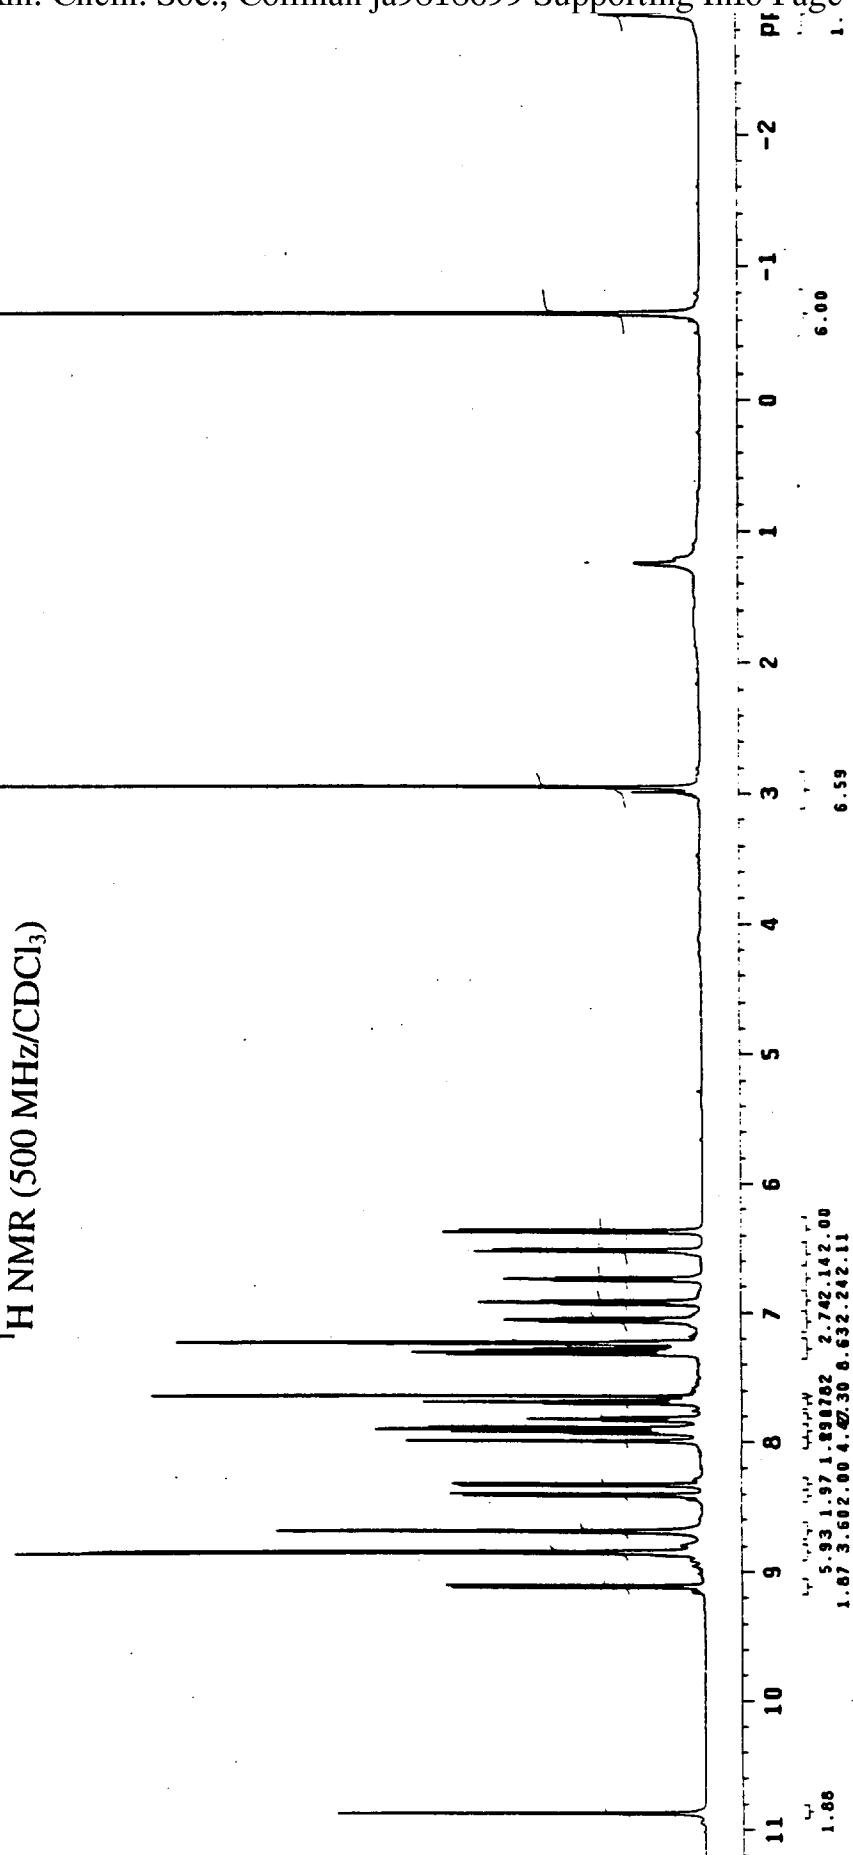

Cyclodex-B-PH  
J & W Scientific  
FID

Column:  
Detection:

GC Conditions:

Racemate  
Oven temperature: 90°C

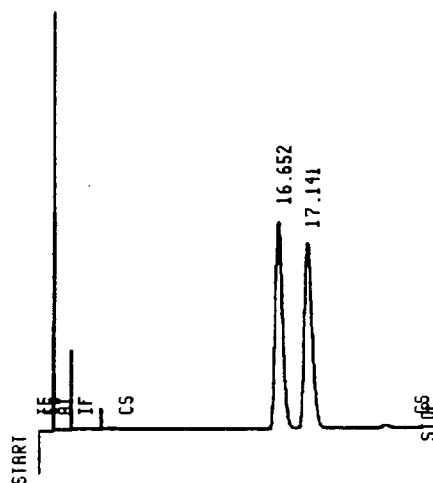

Closing signal file M:SIGNAL .BNC

RUN# 891 AUG 12, 1997 15:00:46

SIGNAL FILE: M:SIGNAL.BNC

| RT     | AREA  | TYPE | WIDTH | AREAX    |
|--------|-------|------|-------|----------|
| 16.652 | 42641 | PB   | .137  | 50.36557 |
| 17.141 | 42022 | BB   | .150  | 49.63443 |

TOTAL AREA= 84663  
MUL FACTOR=1.0000E+00

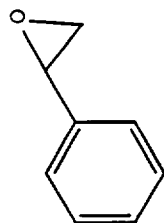

Reaction Product  
Oven temperature: 95°C

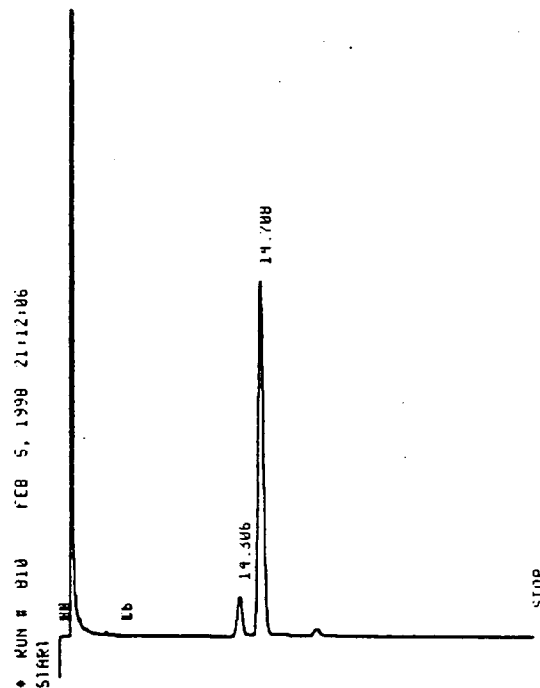

Closing signal file M:SIGNAL .BNC

RUN# 810 FEB 5, 1998 21:12:06

SIGNAL FILE: M:SIGNAL.BNC

| RT     | AREA  | TYPE | WIDTH | AREAX    |
|--------|-------|------|-------|----------|
| 14.506 | 1463  | PP   | .115  | 8.49939  |
| 14.708 | 15750 | PB   | .115  | 91.50061 |

TOTAL AREA= 17213  
MUL FACTOR=1.0000E+00

GC Conditions: Column: Cyclodex-B-PH  
J & W Scientific  
Oven temperature: 70°C  
Detection: FID

### Racemate

• TIME S INTEG M-Y 0  
• TIME AM LMT SP 1 0  
• RUN # 1191 SEP 19, 1997 09:20:50  
START IF

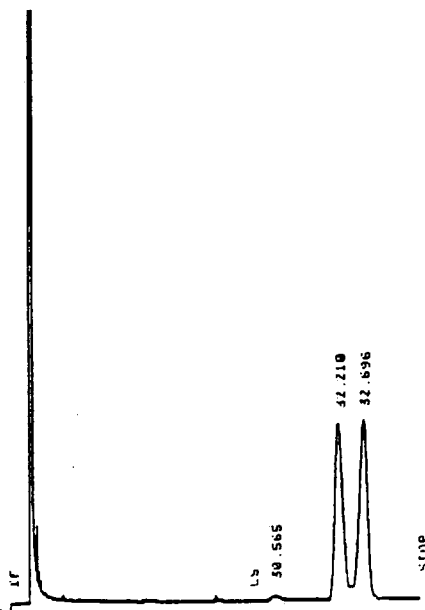

Closing signal file M:SIGNAL.BNC  
RUN# 1191 SEP 19, 1997 09:20:50  
SIGNAL FILE: M:SIGNAL.BNC  
AREAX RT AREA TYPE WIDTH AREAX  
30.565 1447 PU .301 58983  
42.210 191310 PU .233 49.78859  
42.696 141863 UB .310 49.78157  
TOTAL AREA= 283820  
MIN PARTIAL: 0.000000

### Reaction Product

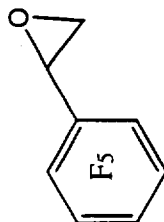

• TIME S INTEG M-Y 0  
• TIME AM LMT SP 1 0  
• RUN # 1191 SEP 19, 1997 09:20:50  
START IF

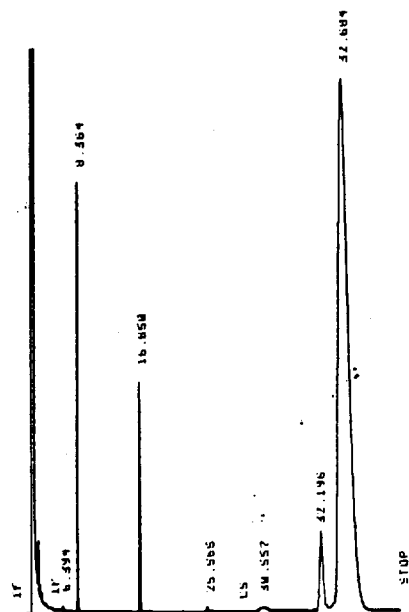

Closing signal file M:SIGNAL.BNC  
RUN# 1191 SEP 19, 1997 09:20:50  
SIGNAL FILE: M:SIGNAL.BNC  
AREAX RT AREA TYPE WIDTH AREAX  
8.394 1447 PP .073 14950  
16.850 27512 PB .075 11.85964  
25.565 26993 PB .135 11.83592  
30.557 1408 PU .251 56384  
42.196 1447 PU .301 42376  
42.684 21952 PU .233 4.45486  
TOTAL AREA= 231980  
MIN PARTIAL: 0.000000

GC conditions: Column: Cyclodex-B-PH  
J & W Scientific  
Oven temperature: 90°C  
Detection: FID

Racemate

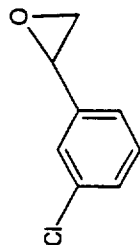

Reaction Mixture

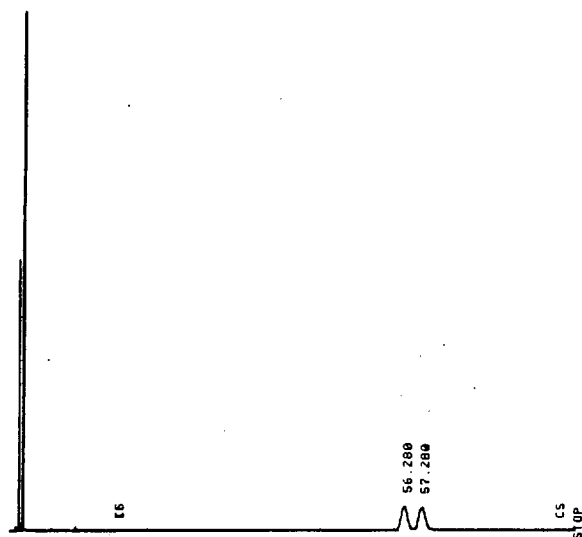

Closing signal file M:SIGNAL .BNC  
RUN# 1745 SEP 1, 1998 15:05:40  
SIGNAL FILE: M:SIGNAL .BNC  
AREAX RT AREA TYPE WIDTH AREAX  
56.280 4870 PU .421 49.89754  
57.280 4898 UP .441 50.10245  
TOTAL AREA= 9768  
MUL FACTOR=1.0000E+00

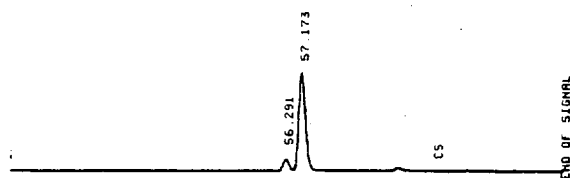

Closing signal file M:SIGNAL .BNC  
RUN# 1744 SEP 1, 1998 12:32:40  
SIGNAL FILE: M:SIGNAL .BNC  
AREAX RT AREA TYPE WIDTH AREAX  
56.291 2115 UD .409 8.89527  
57.173 21651 UB .451 91.10073  
TOTAL AREA= 23766  
MUL FACTOR=1.0000E+00

GC Conditions: Column: Cyclodex-B-PH  
J & W Scientific  
Oven temperature: 125°C  
Detection: FID

### Racemate

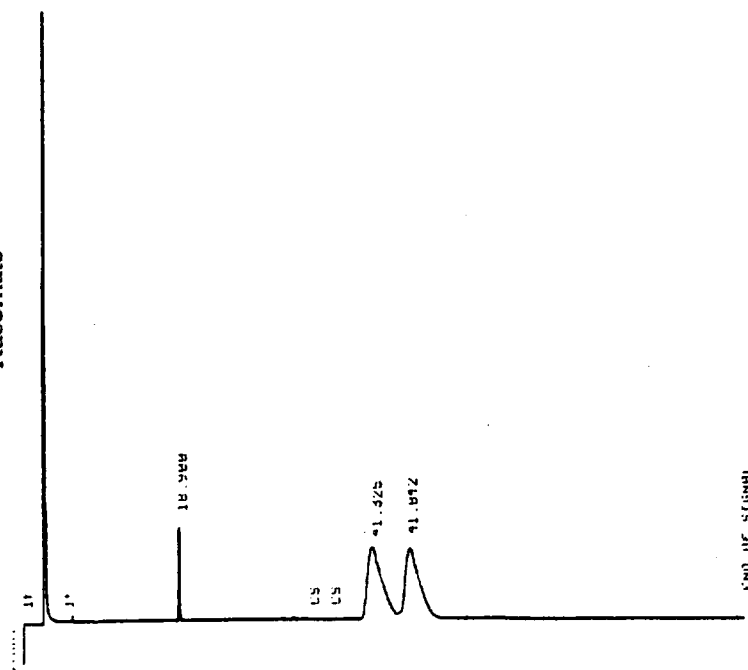

Closing signal file M:SIGNAL.BNH  
RUN# 222 OCT 25, 1997 14:35:36  
SIGNAL FILE: M:SIGNAL.BNH  
AREAX  

| RT     | AREA  | TYPE | WIDTH | AREAX    |
|--------|-------|------|-------|----------|
| 18.930 | 6201  | PB   | .153  | 3.57323  |
| 91.325 | 23782 | PV   | .289  | 18.27821 |
| 91.872 | 23557 | VB   | .401  | 18.14856 |

 TOTAL AREA= 173510  
MUL FACTOR=1.0000E+00

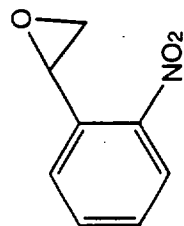

### Reaction Product

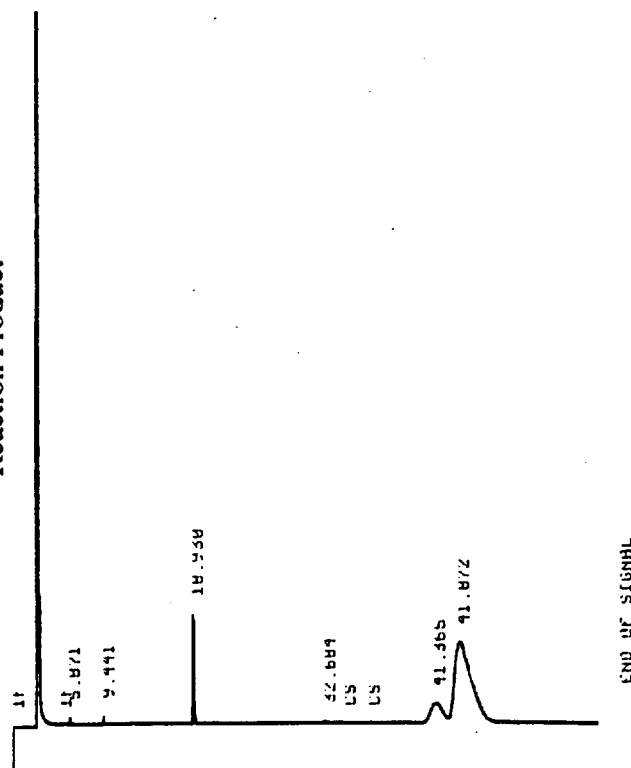

END OF SIGNAL

Closing signal file M:SIGNAL.BNH  
RUN# 222 OCT 25, 1997 14:35:36  
SIGNAL FILE: M:SIGNAL.BNH  
AREAX  

| RT     | AREA  | TYPE | WIDTH | AREAX    |
|--------|-------|------|-------|----------|
| 5.871  | 1071  | GB   | .053  | .68911   |
| 9.441  | 1899  | PB   | .078  | 1.21300  |
| 18.930 | 46201 | PB   | .153  | 29.51123 |
| 42.684 | 2244  | PB   | .281  | 1.43337  |
| 91.365 | 23530 | PV   | .289  | 15.02995 |
| 91.872 | 21609 | VB   | .401  | 52.12833 |

 TOTAL AREA= 156554  
MUL FACTOR=1.0000E+00



GC conditions: Column: Cyclodex-B-PH  
J & W Scientific  
Oven temperature: 110°C  
Detection: FID

Racemate

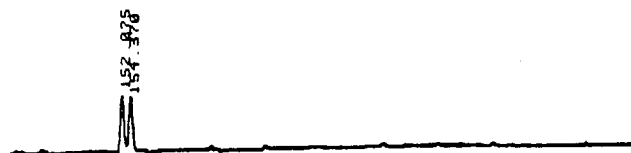

END OF SIGNAL

Closing signal file M:SIGNAL .BNA  
RUN# 1746 SEP 1, 1998 16:22:41  
SIGNAL FILE: M:SIGNAL .BNA  
AREA# RT AREA TYPE WIDTH AREA#  
152.875 5419 PU 1.160 49.89786  
154.370 5473 UP 1.237 58.10216  
TOTAL AREA= 10922  
MUL FACTOR=1.0000E+00

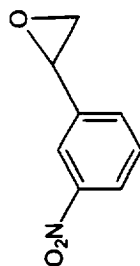

Reaction Mixture

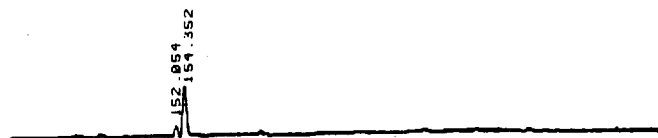

END OF SIGNAL

Closing signal file M:SIGNAL .BNA  
RUN# 1747 SEP 1, 1998 19:22:22  
SIGNAL FILE: M:SIGNAL .BNA  
AREA# RT AREA TYPE WIDTH AREA#  
152.854 12467 PU 1.167 13.88523  
154.352 77319 UP 1.247 86.11476  
TOTAL AREA= 89786  
MUL FACTOR=1.0000E+00

## GC Conditions:

Column:

Cyclodex-B-PH  
J & W Scientific

Detection:

FID

## Racemate

Oven temperature: 100°C

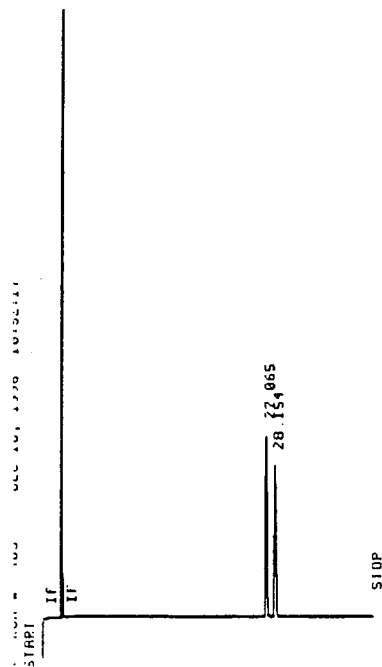

Closing signal file M:SIGNAL.BNC

RUN# 403 DEC 19, 1996 10:52:17

SIGNAL FILE: M:SIGNAL.BNC

| RT     | AREA  | TYPE | WIDTH | APRAX    |
|--------|-------|------|-------|----------|
| 28.134 | 59576 | PB   | .209  | 93.86774 |
| 28.154 | 59892 | PB   | .225  | 58.13225 |

TOTAL AREA= 119468

MUL FACTOR=1.0086E+00

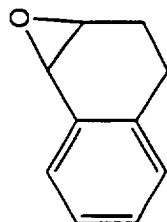

## Reaction Product

Oven temperature: 95°C

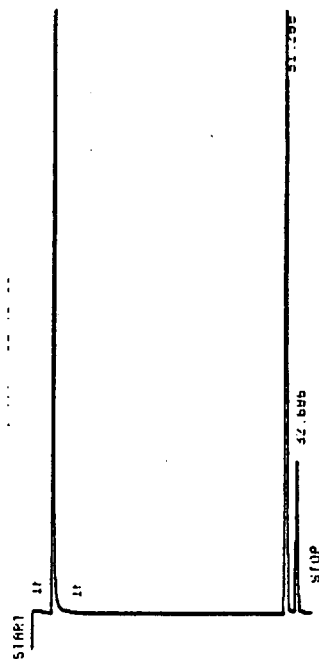

Closing signal file M:SIGNAL.BNC

RUN# 202 OCT 24, 1997 12:40:38

SIGNAL FILE: M:SIGNAL.BNC

| RT     | AREA   | TYPE | WIDTH | APRAX    |
|--------|--------|------|-------|----------|
| 31.289 | 117500 | PB   | .278  | 77.49434 |
| 32.686 | 34153  | PB   | .278  | 22.50565 |

TOTAL AREA= 151653

MUL FACTOR=1.0086E+00

Cyclodex-B-PH  
J & W Scientific  
95°C  
FID

GC Conditions:  
Column:  
Oven temperature:  
Detection:

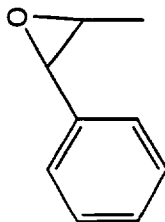

### Racemate

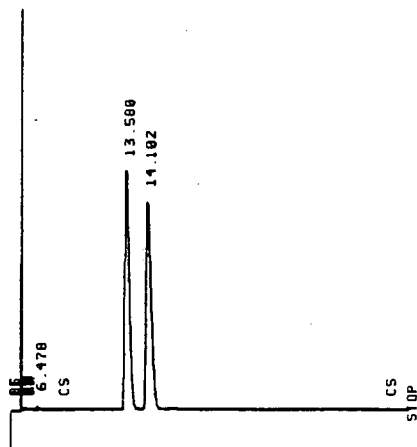

Closing signal file M:SIGNAL .BNC  
RUN# 871 AUG 11, 1997 21:50:20  
SIGNAL FILE: M:SIGNAL.BNC  
AREAX RT AREA TYPE WIDTH AREAX  
6.478 1244 BB .059 .66484  
{ 13.580 92884 PB .121 49.58070  
14.102 93211 BB .139 49.75526  
TOTAL AREA= 107339  
MUL FACTOR=1.0000E+00

### Reaction Product

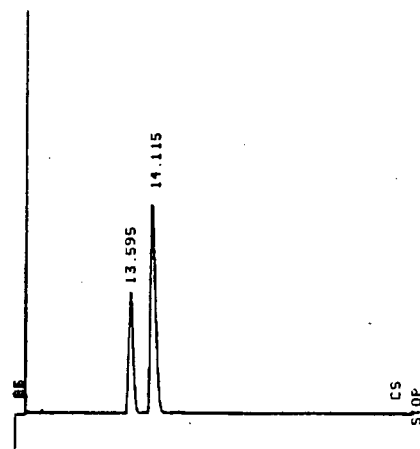

Closing signal file M:SIGNAL .BNC  
RUN# 871 AUG 11, 1997 21:50:20  
SIGNAL FILE: M:SIGNAL.BNC  
AREAX RT AREA TYPE WIDTH AREAX  
13.595 32826 PB .121 25.49983  
14.115 93567 BB .139 74.58017  
TOTAL AREA= 125593  
MUL FACTOR=1.0000E+00

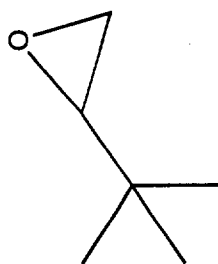

<sup>1</sup>H NMR (400 MHz/CDCl<sub>3</sub>)

Reaction Product + Eu(hfc)<sub>3</sub>

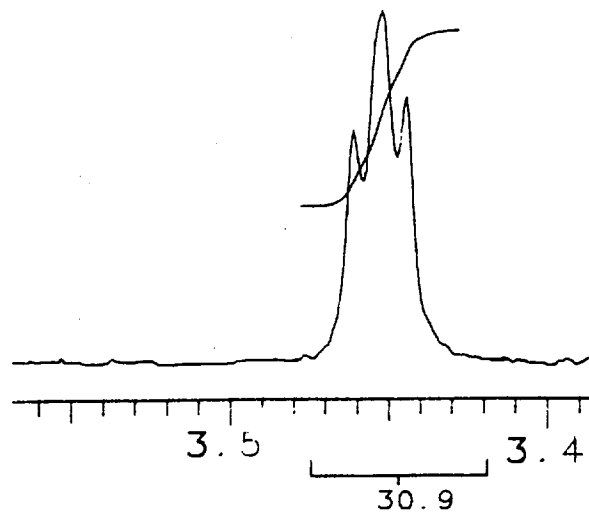

Racemate + Eu(hfc)<sub>3</sub>

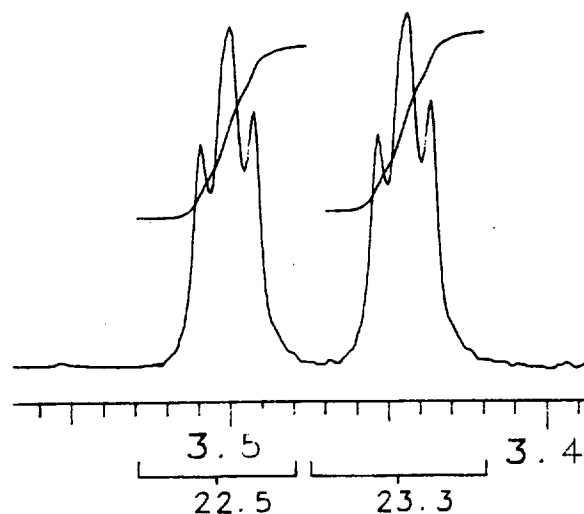

There is no peak corresponding to the minor isomer. Assuming a 5% detection limit for NMR spectrometer, the minor isomer should be  $\leq 5\%$ , and the ee  $\geq 90\%$ .

GC Conditions:

Column:

Cyclodex-B-PH  
J & W Scientific

Oven temperature:

35°C

Detection:

FID

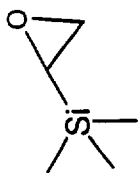

Racemate

Reaction Product

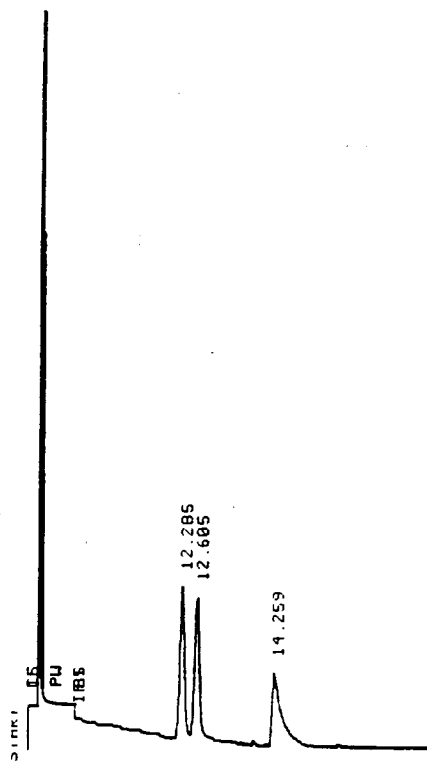

END OF SIGNAL

Closing signal file M:SIGNAL .BNA

RUN# 276 MAR 22, 1998 17:20:13

SIGNAL FILE: M:SIGNAL.BNA

| AREA# | RT     | AREA | TYPE | WIDTH | AREA#    |
|-------|--------|------|------|-------|----------|
| 1     | 12.285 | 1501 | PU   | .113  | 28.80446 |
| 2     | 12.605 | 1493 | UB   | .118  | 28.55894 |
| 3     | 14.259 | 1792 | PB   | .260  | 34.38880 |
| 4     | 23.165 | 425  | PP   | .288  | 8.15582  |

TOTAL AREA= 5211  
MUL FACTOR=1.0000E+00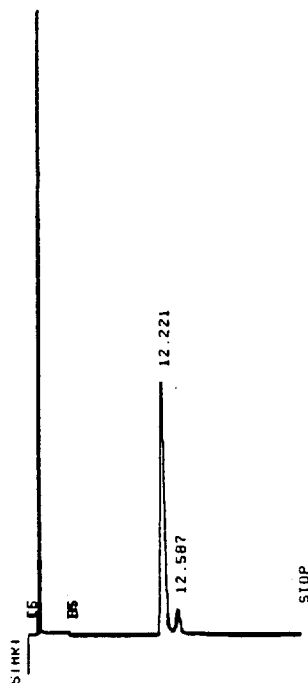

Closing signal file M:SIGNAL .BNC

RUN# 280 MAR 22, 1998 22:33:21

SIGNAL FILE: M:SIGNAL.BNC

| AREA# | RT     | AREA  | TYPE | WIDTH | AREA#    |
|-------|--------|-------|------|-------|----------|
| 1     | 12.221 | 11277 | UU   | .116  | 98.96554 |
| 2     | 12.587 | 1120  | UP   | .113  | 9.83441  |

TOTAL AREA= 12397

MUL FACTOR=1.0000E+00

GC Conditions:      Column:      Cyclodex-B-PH  
                                          J & W Scientific  
                                          Oven temperature: 95°C  
                                          Detection: FID

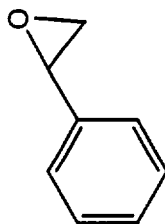

### Reaction Product using pyridine as the ligand

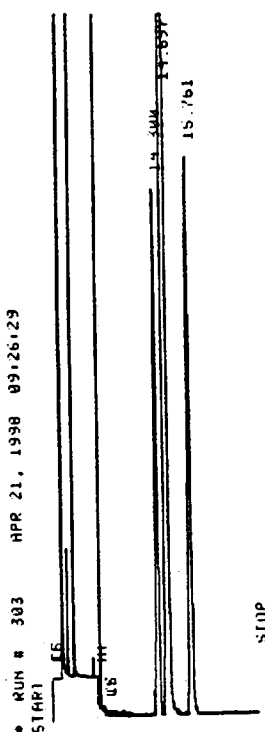

Closing signal file M:SIGNAL .BNC  
 RUN# 303      APR 21, 1998      09:26:29  
 SIGNAL FILE: M:SIGNAL .BNC  
 AREAX RT      AREA TYPE WIDTH      AREAX  
 { 14.300 2626 BP .110 10.60582  
 14.697 18986 PB .119 76.35782  
 15.761 3228 BB .127 13.83716  
 TOTAL AREA= 24760  
 MUL FACTOR=1.0000E+00

### Reaction Product using 2,6-difluoropyridine as the ligand

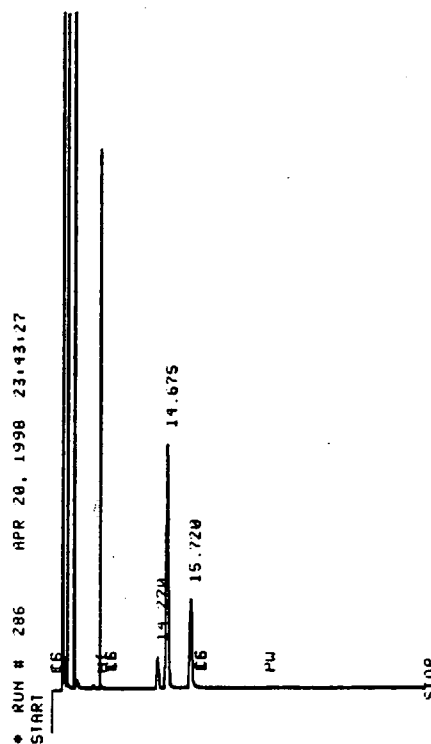

Closing signal file M:SIGNAL .BNC  
 RUN# 286      APR 20, 1998      23:43:27  
 SIGNAL FILE: M:SIGNAL .BNC  
 AREAX RT      AREA TYPE WIDTH      AREAX  
 { 14.270 1290 PP .114 8.43192  
 14.675 10031 PB .116 65.56637  
 15.720 3978 PB .124 26.00171  
 TOTAL AREA= 15299  
 MUL FACTOR=1.0000E+00

GC Conditions: Column: Cyclodex-B-PH  
J & W Scientific  
Oven temperature: 95°C  
Detection: FID

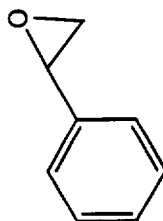

### Reaction Product using DMSO as the ligand

• RUN # 809 FEB 5, 1998 20:50:09  
START

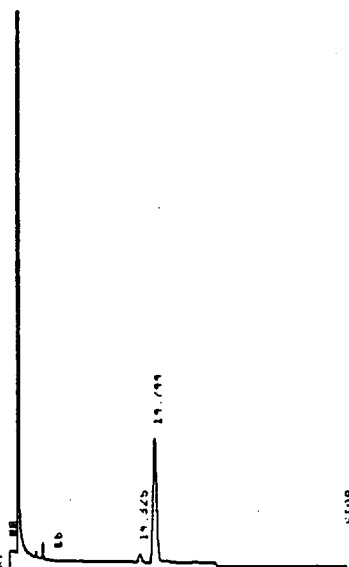

Closing signal file M:SIGNAL.BNC  
RUN# 809 FEB 5, 1998 20:50:09  
SIGNAL FILE: M:SIGNAL.BNC  
AREA# RT AREA TYPE WIDTH AREA#  
14.325 502 BP .118 6.19983  
14.744 7595 PB .114 93.00017  
TOTAL AREA# 8097  
MUL FACTOR=1.0000E+00

### Reaction Product using Br<sup>-</sup> as the ligand

• RUN # 773 FEB 3, 1998 21:10:57  
START

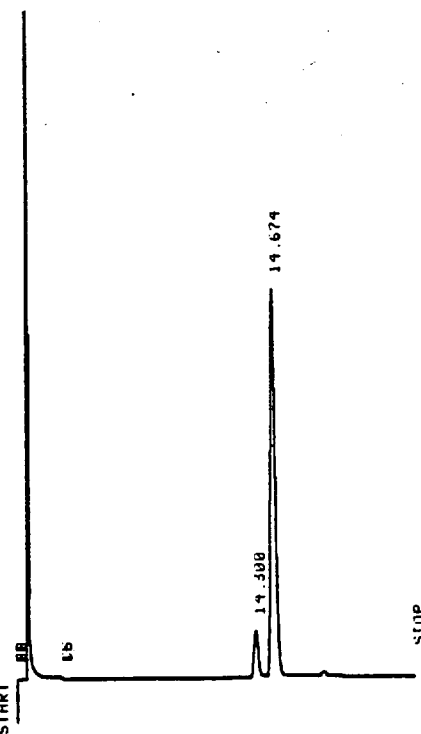

Closing signal file M:SIGNAL.BNC  
RUN# 773 FEB 3, 1998 21:10:57  
SIGNAL FILE: M:SIGNAL.BNC  
AREA# RT AREA TYPE WIDTH AREA#  
14.308 3656 BP .108 9.07334  
14.674 33373 PB .119 90.12666  
TOTAL AREA# 37029  
MUL FACTOR=1.0000E+00
